# Supplementary material for: Molecular Identification and Epidemiological Features of Human Adenoviruses Associated with Acute Respiratory Infections in Hospitalized Children in Southern China, 2012-2013
Source: PubMed Central journal article supplement (PMC4865050; doi:10.1371/journal.pone.0155412), 2016-05-12

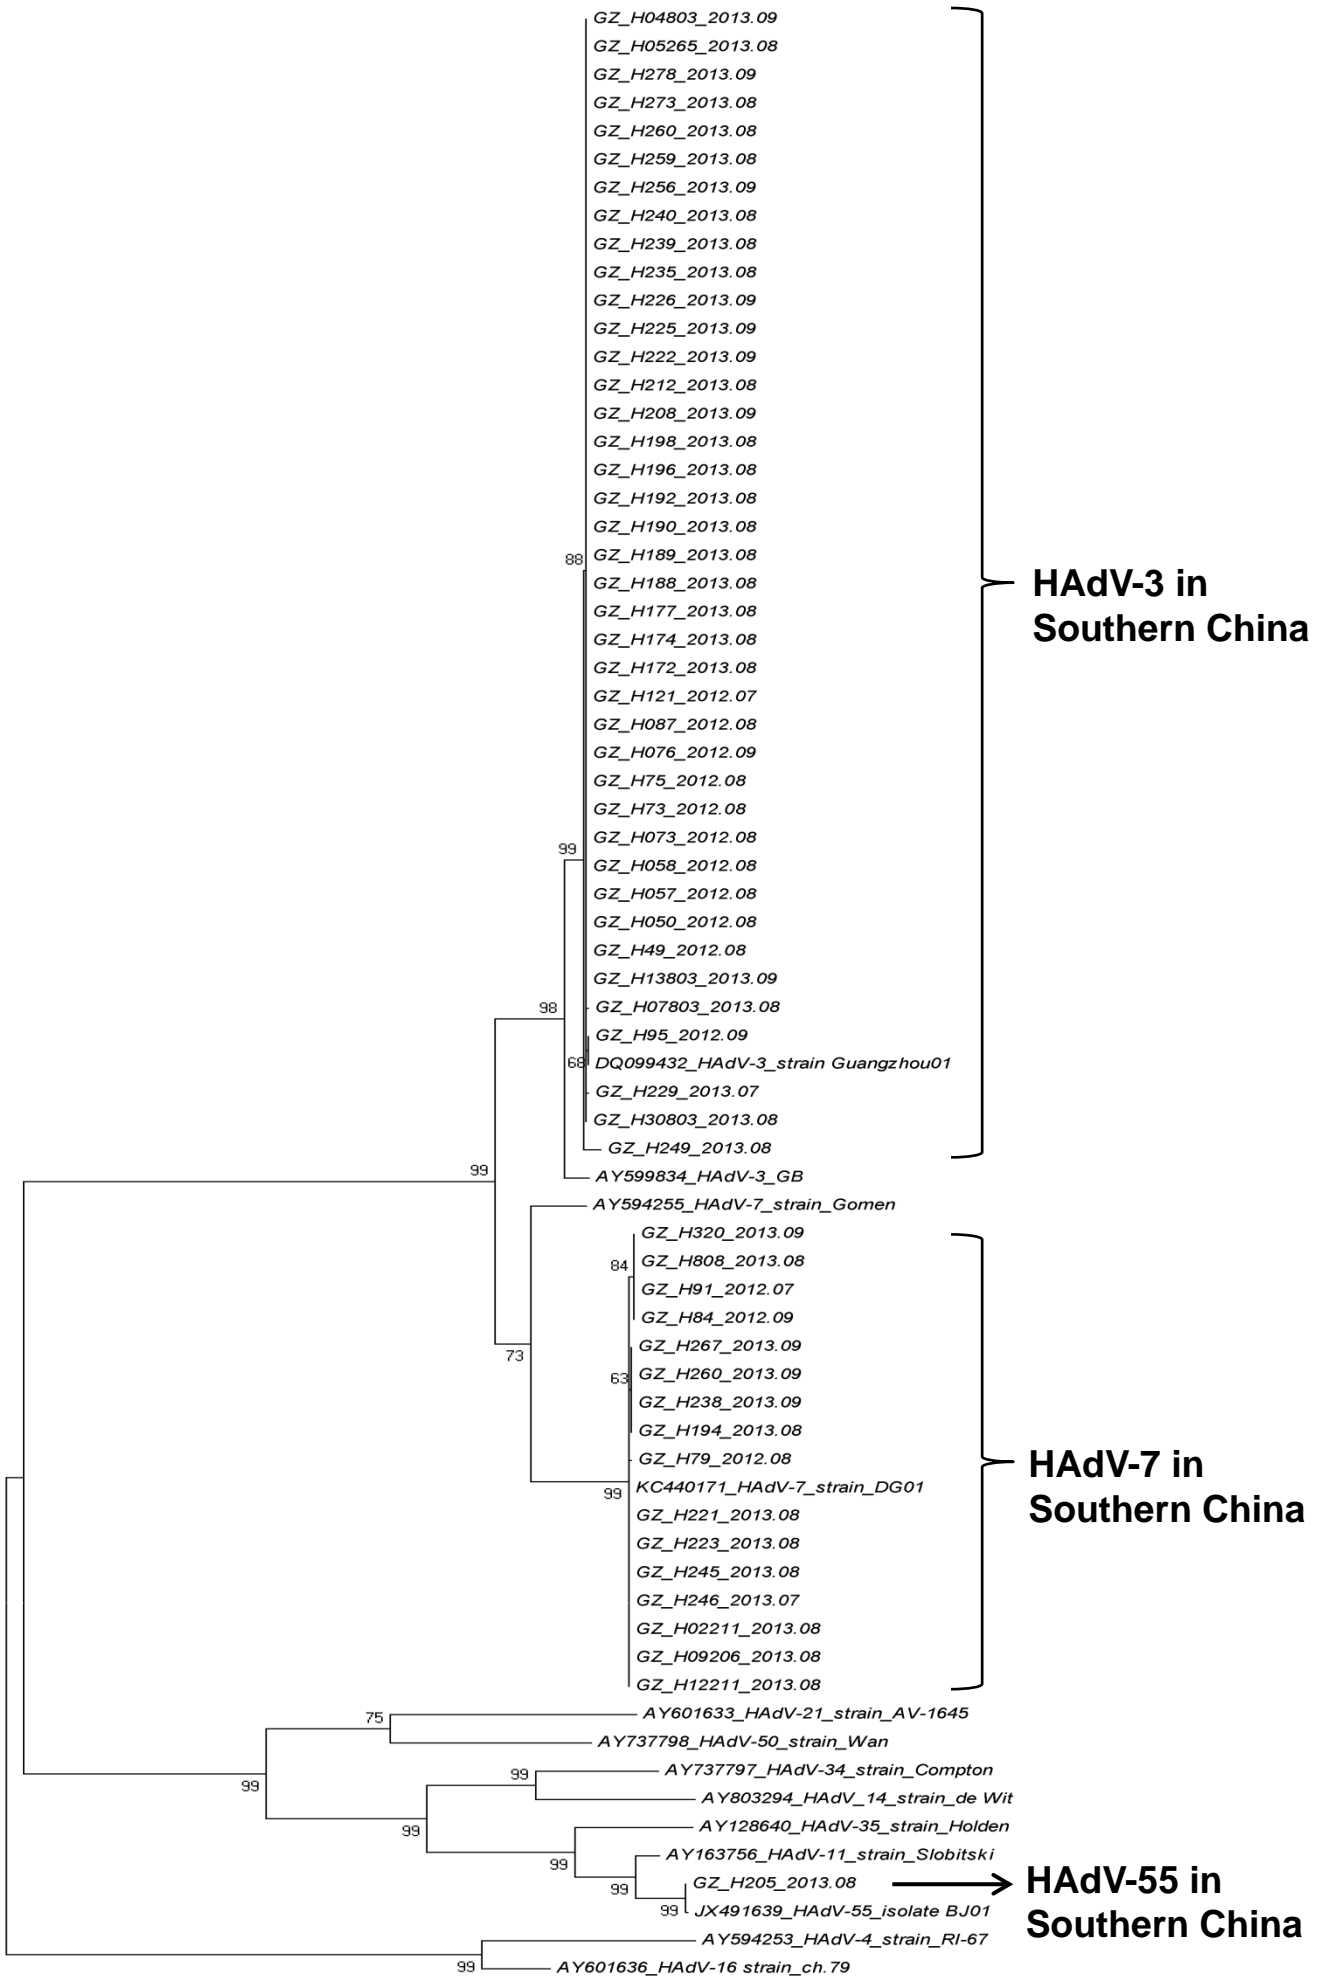

Supplement: pone.0155412.s001.pdf [file pone.0155412.s001.pdf]
